# Supplementary material for: Heated Tobacco Products Have Reached Younger or More Affluent People in Japan
Source: PubMed Central journal article supplement (PMC7878708; doi:10.2188/jea.je20190260), 2021-03-05
Supplement: je-31-187-s001.pdf [file je-31-187-s001.pdf]

**eTable 1.** The distribution of educational attainment and occupation according to smoking status and the type of tobacco products among participants

|       |                      | Total<br>(n=4,926)                                                   |       | Non-<br>smokers<br>(n=4,077) |       | Only<br>combustible<br>cigarette<br>smokers<br>(n=700) |      | HTP<br>smokers <sup>a</sup><br>(n=149) |      |      |
|-------|----------------------|----------------------------------------------------------------------|-------|------------------------------|-------|--------------------------------------------------------|------|----------------------------------------|------|------|
|       |                      | n                                                                    | %     | n                            | %     | n                                                      | %    | n                                      | %    |      |
| Men   | Total                | 2,443                                                                | 100   | 1858                         | 76.1  | 472                                                    | 19.3 | 113                                    | 4.5  |      |
|       | Education attainment |                                                                      |       |                              |       |                                                        |      |                                        |      |      |
|       |                      | Junior high school and High school                                   | 660   | 27.0                         | 494   | 26.6                                                   | 142  | 30.1                                   | 24   | 21.2 |
|       |                      | Technical college, 2-year college and<br>Higher professional school  | 324   | 13.3                         | 231   | 12.4                                                   | 72   | 15.2                                   | 21   | 18.6 |
|       |                      | University and Graduate school                                       | 1,456 | 59.6                         | 1,131 | 60.9                                                   | 257  | 54.5                                   | 68   | 60.2 |
|       |                      | Other                                                                | 3     | 0.1                          | 2     | 0.1                                                    | 1    | 0.2                                    | 0    | 0.0  |
|       | Occupation           |                                                                      |       |                              |       |                                                        |      |                                        |      |      |
|       |                      | Management, Professional, and Technical                              | 682   | 27.9                         | 506   | 27.2                                                   | 138  | 29.2                                   | 38   | 33.6 |
|       |                      | Clerical                                                             | 328   | 13.4                         | 247   | 13.3                                                   | 60   | 12.7                                   | 21   | 18.6 |
|       |                      | Sales and Service                                                    | 339   | 13.9                         | 242   | 13.0                                                   | 74   | 15.7                                   | 23   | 20.3 |
|       |                      | Production process, Transport,<br>Cleaning, and Packaging, etc       | 133   | 5.4                          | 95    | 5.1                                                    | 35   | 7.4                                    | 3    | 2.7  |
|       |                      | Transportation, Machine operation,<br>Construction, and Mining       | 80    | 3.3                          | 52    | 2.8                                                    | 19   | 4.0                                    | 9    | 8.0  |
|       |                      | Part-timer                                                           | 143   | 5.8                          | 116   | 6.3                                                    | 25   | 5.3                                    | 2    | 1.8  |
|       |                      | Inoccupation                                                         | 402   | 16.5                         | 331   | 17.8                                                   | 66   | 14.0                                   | 5    | 4.4  |
|       | Other                | 336                                                                  | 13.8  | 269                          | 14.5  | 55                                                     | 11.7 | 12                                     | 10.6 |      |
| Women | Total                | 2,483                                                                | 100   | 2,219                        | 89.4  | 228                                                    | 9.2  | 36                                     | 1.5  |      |
|       | Education attainment |                                                                      |       |                              |       |                                                        |      |                                        |      |      |
|       |                      | Junior high school and High school                                   | 788   | 31.7                         | 678   | 30.5                                                   | 102  | 44.7                                   | 8    | 22.2 |
|       |                      | Technical college, 2-year college, and<br>Higher professional school | 835   | 33.6                         | 746   | 33.6                                                   | 79   | 34.7                                   | 10   | 27.8 |
|       |                      | University and Graduate school                                       | 858   | 34.6                         | 794   | 35.8                                                   | 46   | 20.2                                   | 18   | 50.0 |
|       |                      | Other                                                                | 2     | 0.1                          | 1     | 0.1                                                    | 1    | 0.4                                    | 0    | 0.0  |

|                                                                |      |      |     |      |    |      |    |      |
|----------------------------------------------------------------|------|------|-----|------|----|------|----|------|
| Occupation                                                     |      |      |     |      |    |      |    |      |
| Management, Professional, and Technical                        | 193  | 8.0  | 174 | 8.0  | 13 | 5.7  | 6  | 16.7 |
| Clerical                                                       | 445  | 17.9 | 396 | 17.8 | 39 | 17.1 | 10 | 27.8 |
| Sales and Service                                              | 194  | 7.8  | 160 | 7.2  | 31 | 13.6 | 3  | 8.3  |
| Production process, Transport,<br>Cleaning, and Packaging, etc | 43   | 1.7  | 34  | 1.5  | 8  | 3.5  | 1  | 2.8  |
| Transportation, Machine operation,<br>Construction, and Mining | 10   | 0.4  | 9   | 0.4  | 1  | 0.5  | 0  | 0.0  |
| Part-timer                                                     | 284  | 11.4 | 259 | 11.6 | 24 | 10.5 | 1  | 2.8  |
| Inoccupation                                                   | 218  | 8.7  | 197 | 8.9  | 18 | 7.9  | 3  | 8.3  |
| Other                                                          | 1096 | 44.1 | 990 | 44.6 | 94 | 41.2 | 12 | 33.3 |

---

HTP, heated tobacco product.

<sup>a</sup>HTP smokers includes smokers using only HTPs or HTPs and other tobacco products.

**eTable 2.** Odds ratios of educational attainment and occupation for smokers (only combustible cigarette or HTP) versus non-smoker using multinomial logistic regression analysis

|                    |                                                                     | OR for being only<br>combustible cigarette<br>smokers | OR for being HTP<br>smokers <sup>b</sup> |
|--------------------|---------------------------------------------------------------------|-------------------------------------------------------|------------------------------------------|
|                    |                                                                     | aOR <sup>a</sup> (95% CI)                             | aOR <sup>a</sup> (95% CI)                |
| Men<br>(n=2,443)   | Education attainment                                                |                                                       |                                          |
|                    | Junior high school and High school                                  | 1.00 (reference)                                      | 1.00 (reference)                         |
|                    | Technical college, 2-year college and<br>Higher professional school | 1.09 (0.79–1.51)                                      | 1.76 (0.96–3.25)                         |
|                    | University and Graduate school                                      | 0.80 (0.63–1.01)                                      | 1.21 (0.75–1.96)                         |
|                    | Other                                                               | 1.79 (0.15–20.7)                                      | –                                        |
|                    | Occupation                                                          |                                                       |                                          |
|                    | Management, Professional, and Technical                             | 1.04 (0.73–1.46)                                      | 1.06 (0.60–1.86)                         |
|                    | Clerical                                                            | 1.00 (reference)                                      | 1.00 (reference)                         |
|                    | Sales and Service                                                   | 1.22 (0.83–1.79)                                      | 1.23 (0.66–2.29)                         |
|                    | Production process, Transport,<br>Cleaning, and Packaging, etc      | 1.47 (0.91–2.39)                                      | 0.38 (0.11–1.32)                         |
|                    | Transportation, Machine operation,<br>Construction, and Mining      | 1.44 (0.79–2.62)                                      | 2.20 (0.94–5.15)                         |
|                    | Part-timer                                                          | 0.98 (0.58–1.65)                                      | 0.18 (0.04–0.77)                         |
|                    | Inoccupation                                                        | 0.75 (0.49–1.12)                                      | 0.27 (0.10–0.74)                         |
|                    | Other                                                               | 0.93 (0.62–1.40)                                      | 0.45 (0.21–0.95)                         |
| Women<br>(n=2,483) | Education attainment                                                |                                                       |                                          |
|                    | Junior high school and High school                                  | 1.00 (reference)                                      | 1.00 (reference)                         |
|                    | Technical college, 2-year college and<br>Higher professional school | 0.67 (0.49–0.92)                                      | 1.12 (0.43–2.87)                         |
|                    | University and Graduate school                                      | 0.42 (0.29–0.60)                                      | 1.49 (0.63–3.50)                         |
|                    | Other                                                               | 6.49 (0.39–106.75)                                    | –                                        |
|                    | Occupation                                                          |                                                       |                                          |
|                    | Management, Professional, and Technical                             | 0.79 (0.41–1.53)                                      | 1.24 (0.44–3.52)                         |
|                    | Clerical                                                            | 1.00 (reference)                                      | 1.00 (reference)                         |
|                    | Sales and Service                                                   | 2.11 (1.26–3.52)                                      | 0.70 (0.19–2.59)                         |

|                                                                |                   |                  |
|----------------------------------------------------------------|-------------------|------------------|
| Production process, Transport,<br>Cleaning, and Packaging, etc | 2.51 (1.08–5.88)  | 1.06 (0.13–8.68) |
| Transportation, Machine operation,<br>Construction, and Mining | 1.22 (0.15–10.18) | –                |
| Part-timer                                                     | 0.94 (0.55–1.61)  | 0.15 (0.02–1.19) |
| Inoccupation                                                   | 1.00 (0.55–1.81)  | 0.63 (0.17–2.37) |
| Other                                                          | 0.93 (0.62–1.39)  | 0.59 (0.25–1.41) |

---

aOR, adjusted odds ratio; CI, confidence interval; HTP, heated tobacco product.

<sup>a</sup> Adjusted for age.

<sup>b</sup>HTP smokers includes smokers using only HTPs or HTPs and other tobacco products.

**eTable 3.** Odds ratios of educational attainment and occupation for HTP smokers versus only combustible cigarette smokers using logistic regression analysis

|                  |                                                                     | OR for being HTP smokers <sup>b</sup> |
|------------------|---------------------------------------------------------------------|---------------------------------------|
|                  |                                                                     | aOR <sup>a</sup> (95% CI)             |
| Men<br>(n=585)   | Education attainment                                                |                                       |
|                  | Junior high school and High school                                  | 1.00 (reference)                      |
|                  | Technical college, 2-year college and<br>Higher professional school | 1.80 (0.90–3.59)                      |
|                  | University and Graduate school                                      | 1.49 (0.87–2.55)                      |
|                  | Other                                                               | –                                     |
|                  | Occupation                                                          |                                       |
|                  | Management, Professional, and Technical                             | 1.14 (0.59–2.22)                      |
|                  | Clerical                                                            | 1.00 (reference)                      |
|                  | Sales and Service                                                   | 1.09 (0.52–2.25)                      |
|                  | Production process, Transport,<br>Cleaning, and Packaging, etc      | 0.30 (0.08–1.12)                      |
|                  | Transportation, Machine operation,<br>Construction, and Mining      | 2.21 (0.89–6.11)                      |
|                  | Part-timer                                                          | 0.27 (0.06–1.33)                      |
|                  | Inoccupation                                                        | 0.58 (0.19–1.78)                      |
|                  | Other                                                               | 0.48 (0.20–1.14)                      |
| Women<br>(n=264) | Education attainment                                                |                                       |
|                  | Junior high school and High school                                  | 1.00 (reference)                      |
|                  | Technical college, 2-year college and<br>Higher professional school | 2.11 (0.75–5.93)                      |
|                  | University and Graduate school                                      | 4.12 (1.55–11.00)                     |
|                  | Other                                                               | –                                     |
|                  | Occupation                                                          |                                       |
|                  | Management, Professional, and Technical                             | 3.21 (0.75–13.70)                     |
|                  | Clerical                                                            | 1.00 (reference)                      |
|                  | Sales and Service                                                   | 0.40 (0.09–1.76)                      |

|                                                                |                  |
|----------------------------------------------------------------|------------------|
| Production process, Transport,<br>Cleaning, and Packaging, etc | 0.56 (0.06–5.63) |
| Transportation, Machine operation,<br>Construction, and Mining | –                |
| Part-timer                                                     | 0.23 (0.03–2.05) |
| Inoccupation                                                   | 0.75 (0.16–3.61) |
| Other                                                          | 0.62 (0.23–1.70) |

---

aOR, adjusted odds ratio; CI, confidence interval; HTP, heated tobacco product.

<sup>a</sup> Adjusted for age.

<sup>b</sup>HTP smokers includes smokers using only HTPs or HTPs and other tobacco products.
